# Supplementary material for: Engineering temperature-sensitive plateletsomes as a tailored chemotherapy platform in combination with HIFU ablation for cancer treatment
Source: PubMed Central journal article supplement — Theranostics. 2019 May 31;9(13):3966–79. doi: 10.7150/thno.32172 (PMC6587342; doi:10.7150/thno.32172), 2019-05-31
Supplement: thnov09p3966s1.pdf [file thnov09p3966s1.pdf]

# Supporting Information

Engineering temperature-sensitive plateletsomes as a tailored chemotherapy platform in combination with HIFU ablation for cancer treatment

*Dongqi Wu<sup>1</sup>, Xing Jin<sup>1</sup>, Xiaobing Wang<sup>1</sup>, Boyu Ma, Chenmei Lou, Haijing Qu, Jian Zheng, Binxuan Zhang, Xiufeng Yan, Yang Wang, Lijia Jing\**

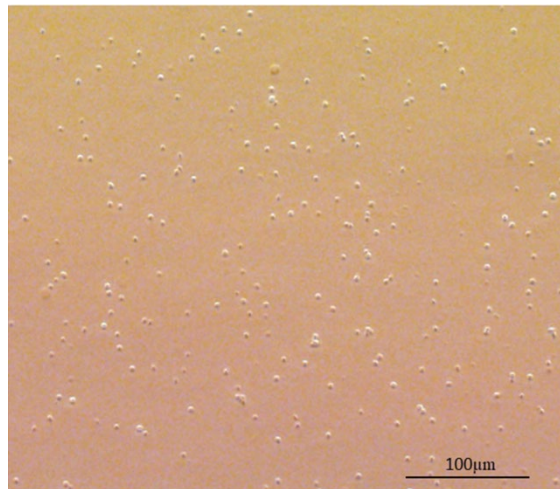

**Figure S1.** Microscopy image of PLTs collected from fresh mouse blood.

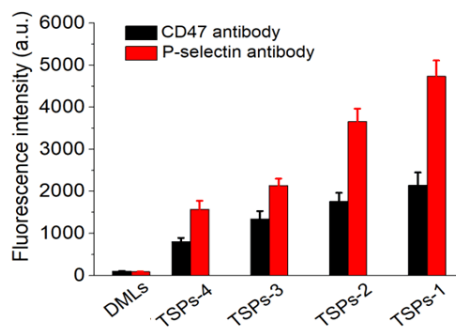

**Figure S2.** The fluorescence intensities of the same amount of nanovesicles after incubating with fluorescent antibodies.

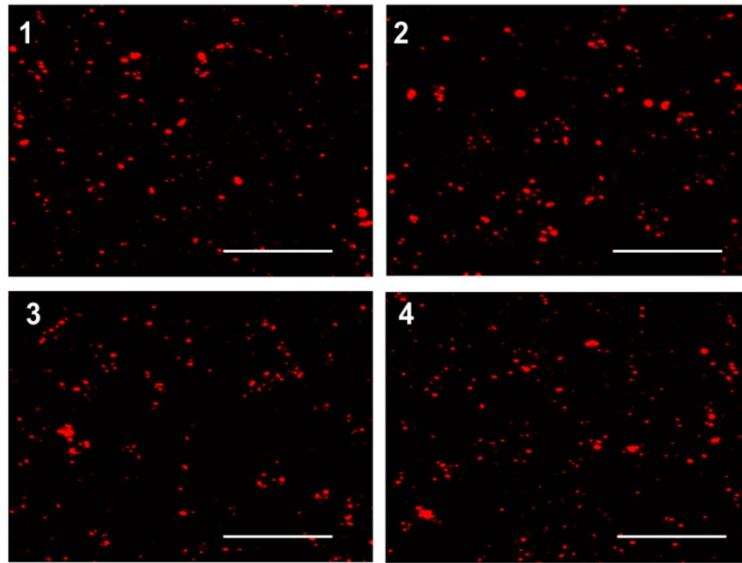

**Figure S3.** Confocal fluorescent microscopy images of DOX loaded TSPs. 1) TSPs-1, 2) TSPs-2, 3) TSPs-3, and 4) TSPs-4. (red signal, DOX; scale bar =10  $\mu\text{m}$ ).

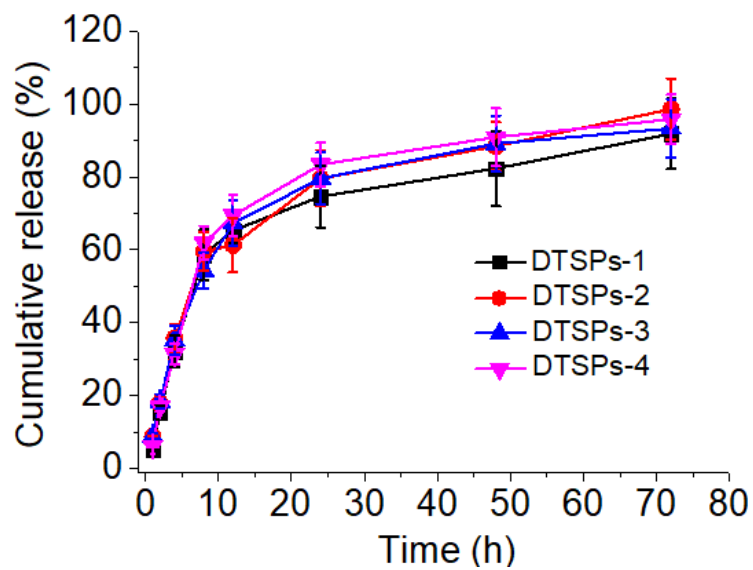

**Figure S4.** *In vitro* release behavior of DOX from different TSPs at 37 °C in RPMI-1640 medium containing 10% FBS.

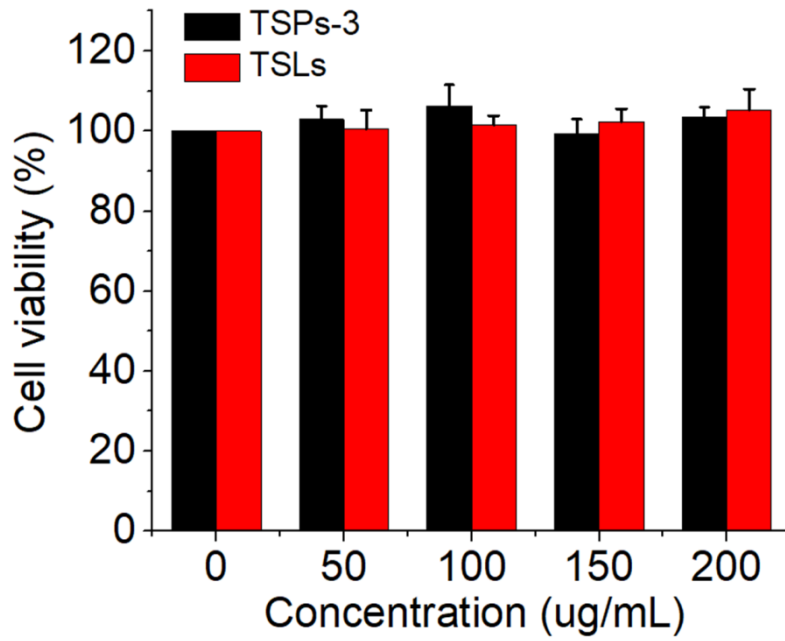

**Figure S5.** Cell viability of HeLa cells after incubation with TSPs-3 and TSLs at different concentrations for 48 h.

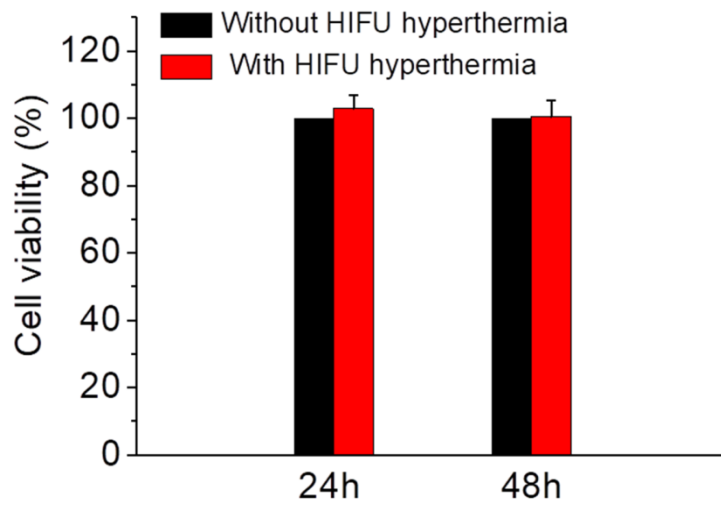

**Figure S6.** Cell viability of HeLa cells determined after treatment with or without HIFU hyperthermia (42 °C, 2 min) for 24 and 48 h.

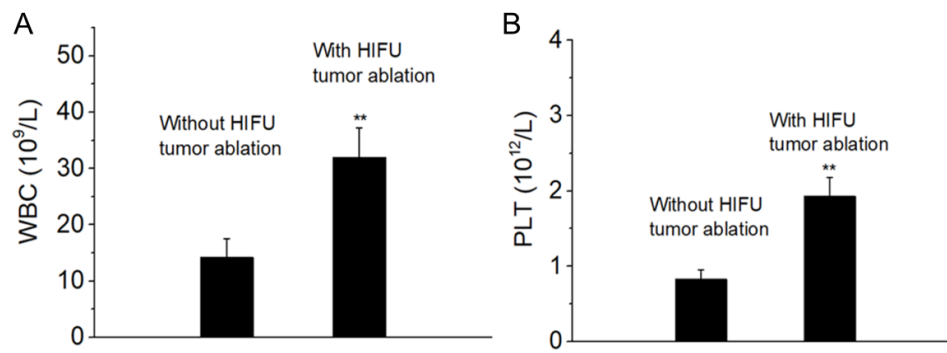

**Figure S7.** The levels of (A) white blood cells (WBC) and (B) platelets (PLT) in the blood samples of mice with or without HIFU tumour ablation.

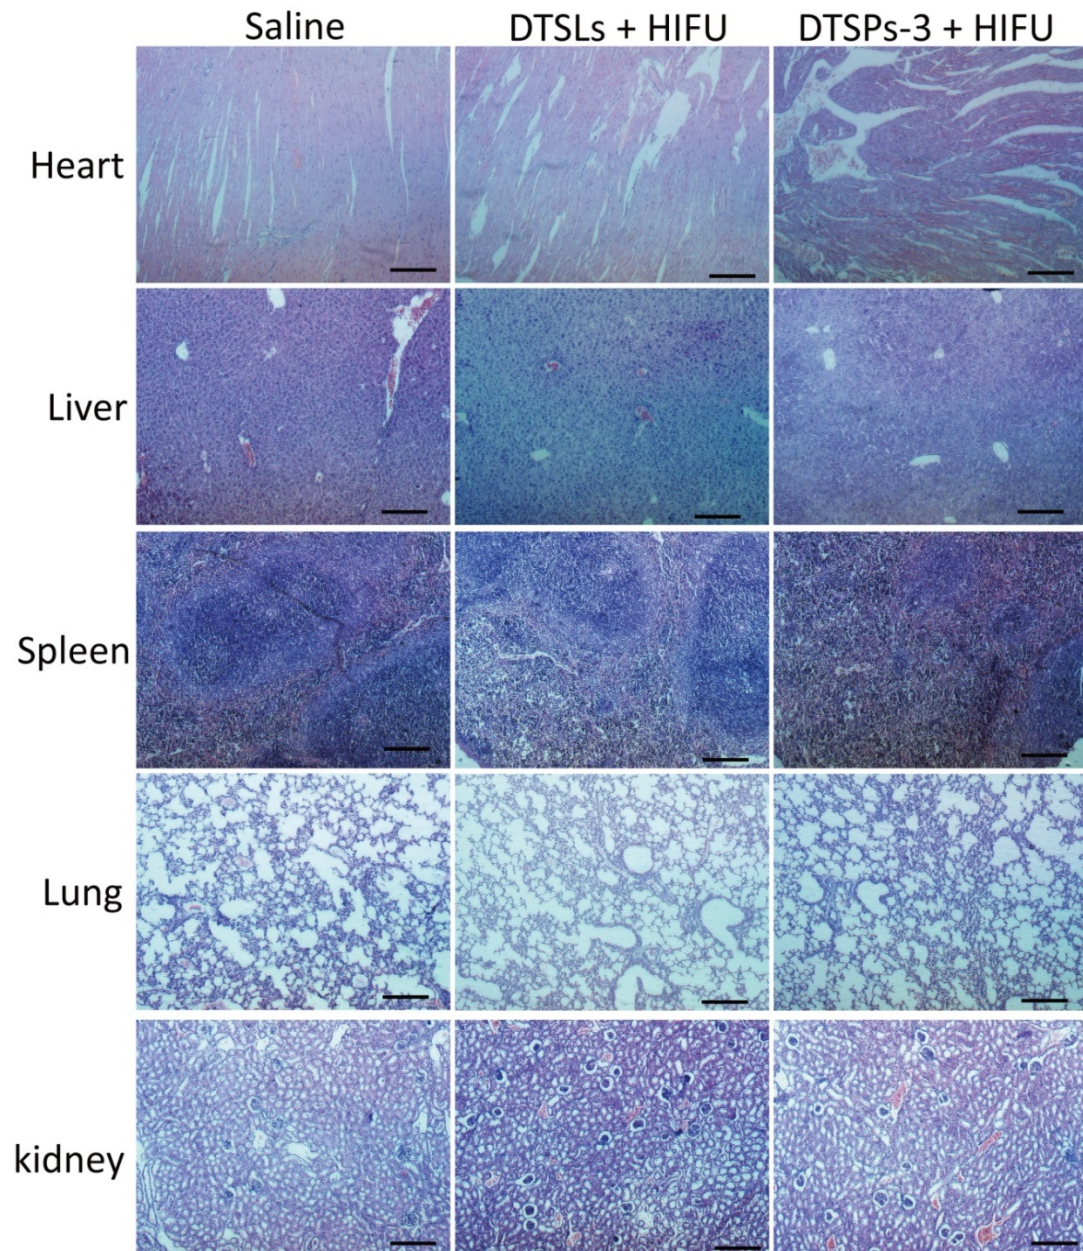

**Figure S8.** Histological section of vital organs (heart, liver, spleen, lung and kidney) with H&E staining at 18 days after administration of saline, DTSLs + HIFU and DTSPs-3 + HIFU (Scale bar = 100  $\mu$ m).

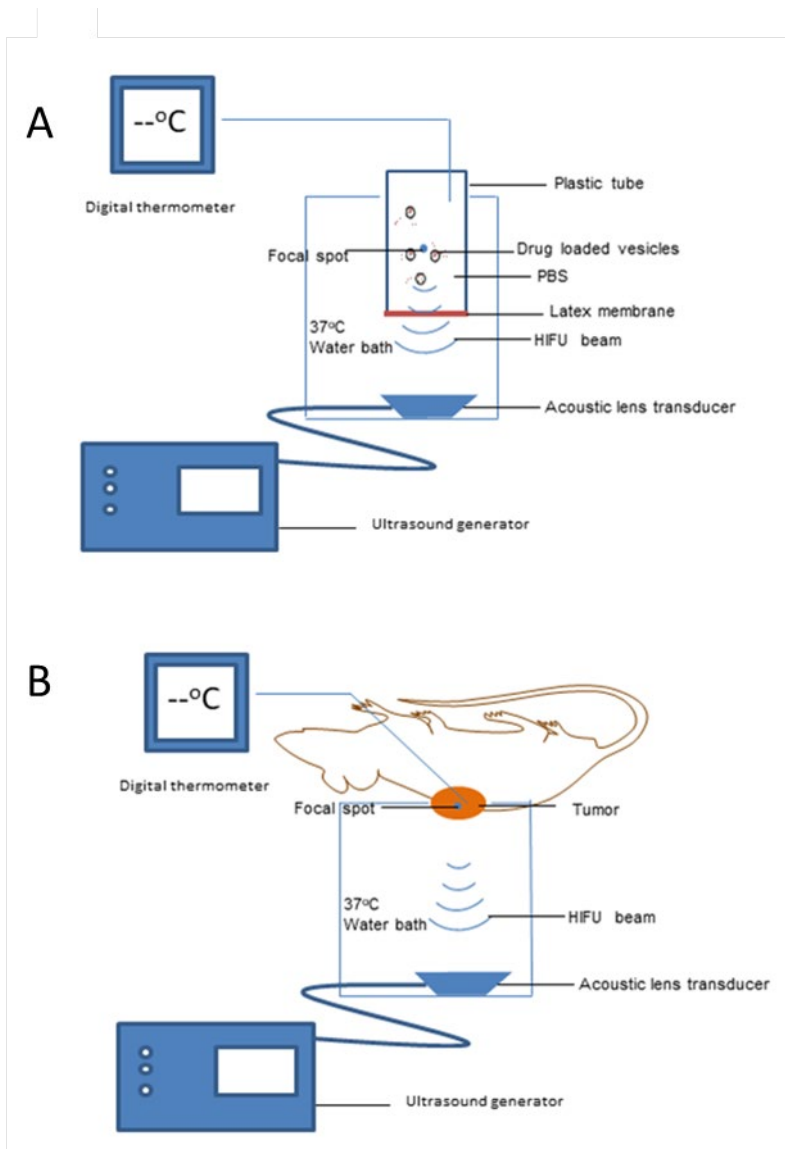

**Figure S9.** HIFU equipments for investigation of drug release (A) and *in vivo* tumour therapy (B).

**Table S1.** Summary of formulation parameters

| Formulation | Compositions                                                                      | Size distribution [nm] | PDI   | Drug encapsulation efficiency [%] |
|-------------|-----------------------------------------------------------------------------------|------------------------|-------|-----------------------------------|
| TSPs-1      | DPPC &MSPC/ PLT membrane (20:80 in mass ratio); DPPC/MSPC (80: 20 in molar ratio) | 118.6 ± 2.86           | 0.053 | 80.45 ± 2.23                      |
| TSPs-2      | DPPC &MSPC/ PLT membrane (35:65 in mass ratio); DPPC/MSPC (80: 20 in molar ratio) | 121.72 ± 3.12          | 0.045 | 84.36 ± 3.57                      |
| TSPs-3      | DPPC &MSPC/ PLT membrane (50:50 in mass ratio); DPPC/MSPC (80: 20 in molar ratio) | 119.26 ± 5.77          | 0.039 | 85.27± 4.12                       |
| TSPs-4      | DPPC &MSPC/ PLT membrane (65:35 in mass ratio); DPPC/MSPC (80: 20 in molar ratio) | 123.67 ± 4.52          | 0.092 | 88.54 ± 5.45                      |
| TSLs        | DPPC/MSPC/DSPE-PEG2000 (86.5: 9.7: 3.8 in molar ratio);                           | 109.58 ± 3.69          | 0.045 | 87.25 ± 2.68                      |
| DMLs        | DPPC/MSPC (90: 10 in molar ratio)                                                 | 113.09 ± 2.66          | 0.045 | 89.57 ± 5.21                      |
| NPVs        | Pure PLT membrane                                                                 | 116.28 ± 6.88          | 0.091 |                                   |

**Table S2.** Blood cellular and biochemical indexes.

| Parameters                     | Saline         | DTSLs + HIFU   | DTSPs-3 + HIFU  |
|--------------------------------|----------------|----------------|-----------------|
| WBC ( $10^9/L$ )               | 12.65 ± 2.83   | 13.02 ± 2.12   | 13.56 ± 1.88    |
| RBC ( $10^{12}/L$ )            | 10.53 ± 1.62   | 11.88 ± 1.93   | 9.98 ± 2.89     |
| PLT ( $10^{12}/L$ )            | 1.02 ± 0.12    | 0.97 ± 0.09    | 1.18 ± 0.11     |
| GRN ( $10^9/L$ )               | 6.97 ± 0.97    | 7.24 ± 0.67    | 7.45 ± 1.23     |
| AST U L <sup>-1</sup>          | 521.74 ± 96.89 | 495.23 ± 107.7 | 519.32 ± 103.96 |
| ALT U L <sup>-1</sup>          | 102.41 ± 24.56 | 118.33 ± 15.54 | 109.88 ± 19.35  |
| ALP U L <sup>-1</sup>          | 207.32 ± 24.53 | 221.34 ± 27.89 | 198.56 ± 18.45  |
| CREA $\mu$ mol L <sup>-1</sup> | 23.8 ± 3.5     | 21.98 ± 3.97   | 19.76 ± 1.23    |
| BUN mmol L <sup>-1</sup>       | 10.04 ± 1.2    | 9.86 ± 1.12    | 10.76 ± 1.32    |
